# Supplementary material for: Behavioral Factors Associated with COVID-19 Risk: A Cross-Sectional Survey in Japan
Source: MDPI journal article supplement (doi:10.3390/ijerph182212184), 2021-11-20
Supplement: s1 [file s1]

**Table S1. Contents of questionnaire**

|                                                                                                                                                                                                                                                                                                                                                                                                                                                                                                                                                                                                 |
|-------------------------------------------------------------------------------------------------------------------------------------------------------------------------------------------------------------------------------------------------------------------------------------------------------------------------------------------------------------------------------------------------------------------------------------------------------------------------------------------------------------------------------------------------------------------------------------------------|
| <b>I. Have you been diagnosed with COVID-19 at a medical facility?</b><br>1. I have been diagnosed with COVID-19 at a medical facility and am currently under treatment.<br>2. I was diagnosed with COVID-19 at a medical facility and have already recovered.<br>3. I have not been diagnosed with COVID-19 or have not seen a doctor.                                                                                                                                                                                                                                                         |
| <b>II. Which disease(s) do you currently have? Select all that apply from the following choices.</b><br>1. High blood pressure<br>2. Lipid abnormalities<br>3. Diabetes<br>4. Heart disease<br>5. Kidney disease<br>6. Cancer<br>7. Lung or respiratory disease<br>8. Disease due to which you were prohibited by a doctor from exercising, or disease or injury due to which you have major difficulties in walking (e.g., rheumatoid arthritis and bone fracture)                                                                                                                             |
| <b>III. Which of the following are you conscious about to avoid contracting COVID-19?</b><br>1. I do not go to poorly ventilated places.<br>2. I do not go to places where many people gather.<br>3. I do not talk or project my voice near someone.<br>4. I wear a mask.<br>5. I wash my hands.<br>6. I disinfect my hands.<br>7. I change my clothes frequently.<br>8. I gargle.<br>9. I disinfect my belongings.<br>10. I keep distance from others when I go out.<br>11. I refrain from visiting hospitals and clinics as much as possible.<br>12. I try to go out as seldomly as possible. |
| <b>IV. Please tell me the average days you exercise in a week in number.</b>                                                                                                                                                                                                                                                                                                                                                                                                                                                                                                                    |
| <b>V. Please tell me the average number of hours that you exercise in a day.</b><br>1. Less than 30 minutes.<br>2. 30 min or more but less than 1 hour<br>3. 1 h or more but less than 2 hours<br>4. 2 hours or more                                                                                                                                                                                                                                                                                                                                                                            |
| <b>VI. Which of the following is your main exercise?</b><br>1. Walking<br>2. Running<br>3. Weight training<br>4. Calisthenics or stretching<br>5. Other                                                                                                                                                                                                                                                                                                                                                                                                                                         |
| <b>VII. How has the amount of exercise changed compared with the same time last year?</b><br>1. Decreased greatly<br>2. Decreased slightly<br>3. No change<br>4. Increased slightly<br>5. Increased greatly                                                                                                                                                                                                                                                                                                                                                                                     |
| <b>VIII. How often have you gone out in the past one month?</b><br>1. Almost daily<br>2. 4-5 days per week<br>3. 2-3 days per week<br>4. About 1 day per week<br>5. About 1 day per month<br>6. Not gone out at all                                                                                                                                                                                                                                                                                                                                                                             |
| <b>IX. Have you worked from home in the past one month?</b><br>1. Largely worked from home<br>2. Worked from home half or more of the time<br>3. Worked from home less than half of the time<br>4. Almost never                                                                                                                                                                                                                                                                                                                                                                                 |

Table S2. Results of sensitivity analysis.

|                                |                                                                 | Multiple regression |        |       |       | IPW           |        |        |       |
|--------------------------------|-----------------------------------------------------------------|---------------------|--------|-------|-------|---------------|--------|--------|-------|
|                                |                                                                 | OR                  | 95% CI |       | p     | ATE           | 95% CI |        | p     |
| Age                            |                                                                 | 0.95                | 0.93   | 0.97  | <0.01 |               |        |        |       |
| Gender                         | Male                                                            | 1.01                | 0.94   | 1.09  | 0.83  |               |        |        |       |
| BMI                            |                                                                 | 1.41                | 0.80   | 2.50  | 0.23  |               |        |        |       |
| Pre-existing condition         | High blood pressure                                             | 1.56                | 0.69   | 3.53  | 0.28  | 206.4         | -14.5  | 427.3  | 0.07  |
|                                | Lipid abnormalities                                             | 1.16                | 0.42   | 3.19  | 0.78  | 54.4          | -74.7  | 183.5  | 0.41  |
|                                | Diabetes                                                        | 2.27                | 0.78   | 6.59  | 0.13  | 85.8          | -69.0  | 240.7  | 0.28  |
|                                | Heart disease                                                   | 3.13                | 0.82   | 11.90 | 0.10  | 859.6         | -175.7 | 1894.9 | 0.10  |
|                                | Other condition*                                                | 1.61                | 0.20   | 12.98 | 0.65  | 119.4         | -189.3 | 428.1  | 0.45  |
| Lifestyle                      | Avoid poorly ventilated places                                  | 4.31                | 1.65   | 11.28 | <0.01 | 24.2          | -19.5  | 67.9   | 0.28  |
|                                | Avoid places where many people gather                           | 0.31                | 0.13   | 0.74  | 0.01  | -13.3         | -49.2  | 22.7   | 0.47  |
|                                | Avoid talking or projecting voice near someone                  | 2.20                | 0.90   | 5.35  | 0.08  | 6.4           | -33.6  | 46.4   | 0.75  |
|                                | Wear a mask                                                     | 1.03                | 0.38   | 2.82  | 0.95  | -20.3         | -57.0  | 16.5   | 0.28  |
|                                | Wash hands                                                      | 0.36                | 0.12   | 1.05  | 0.06  | -29.5         | -63.7  | 4.7    | 0.09  |
|                                | Disinfect hands                                                 | 0.41                | 0.18   | 0.95  | 0.04  | -30.5         | -62.8  | 1.9    | 0.07  |
|                                | Change clothes frequently                                       | 2.16                | 0.93   | 5.03  | 0.07  | 248.0         | 100.1  | 395.8  | <0.01 |
|                                | Gargle                                                          | 1.87                | 0.87   | 4.00  | 0.11  | 10.6          | -30.4  | 51.6   | 0.61  |
|                                | Disinfect belongings                                            | 2.05                | 0.91   | 4.62  | 0.08  | 140.8         | 44.2   | 237.4  | <0.01 |
|                                | Keep distance from others when going out                        | 0.30                | 0.14   | 0.66  | <0.01 | -17.6         | -52.8  | 17.6   | 0.33  |
|                                | Refrain from visiting hospitals and clinics as much as possible | 1.10                | 0.54   | 2.21  | 0.80  | 57.1          | -7.1   | 121.2  | 0.08  |
|                                | Try to go out as seldom as possible                             | 1.29                | 0.65   | 2.56  | 0.47  | 0.0           | -40.2  | 40.2   | 1.00  |
| Frequency of working from home | Largely all of the time                                         | 1 (Reference)       |        |       |       | 0 (Reference) |        |        |       |
|                                | Half or more of the time                                        | 2.28                | 0.91   | 5.71  | 0.08  | 106.5         | -34.0  | 247.1  | 0.14  |
|                                | Less than half or more of the time                              | 1.53                | 0.57   | 4.09  | 0.40  | 15.3          | -89.6  | 120.1  | 0.78  |
|                                | Almost never                                                    | 0.68                | 0.32   | 1.44  | 0.31  | -49.1         | -117.6 | 19.3   | 0.16  |

IPW: inverse probability weighting analysis, OR: odds ratio; N.A. : not applicable, ATE: average treatment effect, CI: confidence interval

\* Disease due to which you were prohibited by a doctor from exercising, or disease or injury due to which you have major difficulties in walking (e.g., rheumatoid arthritis and bone fracture)
